# Supplementary material for: Imaging methods are vastly underreported in biomedical research
Source: eLife. 2020 Aug 11;9:e55133. doi: 10.7554/eLife.55133 (PMC7434332; doi:10.7554/eLife.55133)
Supplement: Supplementary file 1. [file elife-55133-supp1.xlsx]

## Sheet: Developmental Biology
Journal volume (issue)	Pub Date	DOI	Author	Title	Figures	Imaging figures	Supp Figs	Supp Imaging Figs	Total Figs	Total I Figs	Total text M&M, words	Text Imaging, words	Objective lens	Digitization	Spectral settings	EM score	Global score	Imaging modalities
Developmental Biology 441(1)	2018-09-01	doi.org/10.1016/j.ydbio.2018.06.017	Morgani	A Sprouty4 reporter to monitor FGFERK signaling activity in ESCs and mice	10	10	10	8	20	18	4347	46	F	F	F		F	LSC, F
Developmental Biology 441(1)	2018-09-01	doi.org/10.1016/j.ydbio.2018.07.001	Grover	Augmentation of a wound response element accompanies the origin of a Hox-regulated Drosophila abdominal pigmentation trait	11	10	6	5	17	15	2047	85	F	F	F		F	LSC, T
Developmental Biology 441(1)	2018-09-01	doi.org/10.1016/j.ydbio.2018.06.006	Williams	CDK-11-Cyclin L is required for gametogenesis and fertility in C. elegans	8	6	6	4	14	10	1568	94	P	F	F		F	SDC, D
Developmental Biology 441(1)	2018-09-01	doi.org/10.1016/j.ydbio.2018.06.022	Lim	Characterization of C-C motif chemokine ligand 4 in the porcineendometrium during the presence of the maternal–fetal interface	10	2	0	0	10	2	2184	55	F	F	NA		F	T
Developmental Biology 441(1)	2018-09-01	doi.org/10.1016/j.ydbio.2018.07.003	Li	Constitutive activation of hedgehog signaling adversely affects epithelial cell fate during palatal fusion	7	6	4	4	11	10	1320	15	F	F	P		F	F, T
Developmental Biology 441(1)	2018-09-01	doi.org/10.1016/j.ydbio.2018.06.010	Swid	Differential impacts of FtsZ proteins on plastid division in the shoot apex of Arabidopsis	7	5	1	1	8	6	1379	220	P	P	P		P	LSC
Developmental Biology 441(1)	2018-09-01	doi.org/10.1016/j.ydbio.2018.07.002	Yuan	Gliogenesis in lampreys shares gene regulatory interactions witholigodendrocyte development in jawed vertebrates	8	6	7	5	15	11	1161	20	F	F	F		F	SIM
Developmental Biology 441(1)	2018-09-01	doi.org/10.1016/j.ydbio.2018.06.020	Baldeosingh	Hedgehog signaling from the Posterior Signaling Center maintainsU-shaped expression and a prohemocyte population in Drosophila	7	7	5	5	12	12	1224	14	F	F	F		F	LSC, F
Developmental Biology 441(1)	2018-09-01	doi.org/10.1016/j.ydbio.2018.05.021	Ahmed-de-Prado	JNK and JAK/STAT signalling are required for inducing loss of cell fate specification during imaginal wing discs regeneration in Drosophila melanogaster	7	7	12	10	19	17	928	19	F	F	F		F	LSC
Developmental Biology 441(1)	2018-09-01	doi.org/10.1016/j.ydbio.2018.06.007	Lin	The transcription factor Tfap2eAP-2ε plays a pivotal role in maintaining the identity of basal vomeronasal sensory neurons	9	7	1	1	10	8	1535	30	F	F	F		F	LSC, F
Developmental Biology 440(2)	2018-08-15	doi.org/10.1016/j.ydbio.2018.05.010	Bernstein	The cellular bases of choroid fissure formation and closure	8	7	8	8	16	15	427	74	F	F	F		F	LSC, SDC, F, T
Developmental Biology 440(2)	2018-08-15	doi.org/10.1016/j.ydbio.2018.05.015	Cheng	Bergmann glial Sonic hedgehog signaling activity is required for proper cerebellar cortical expansion and architecture	8	8	2	1	10	9	788	34	F	F	NA		F	T
Developmental Biology 440(2)	2018-08-15	doi.org/10.1016/j.ydbio.2018.05.004	Dannenberg	Regeneration of the germline in the annelid Capitella teleta	9	7	5	1	14	8	1291	85	F	F	NA		F	T
Developmental Biology 440(2)	2018-08-15	doi.org/10.1016/j.ydbio.2018.05.006	Kline	The Misshapen kinase regulates the size and stability of the germline ring canals in the Drosophila egg chamber	5	5	2	2	7	7	1213	122	P	F	F		F	LSC, F
Developmental Biology 440(2)	2018-08-15	doi.org/10.1016/j.ydbio.2018.05.008	Meng	Repression of MAP3K1 expression and JNK activity by canonical Wnt signaling	6	3	0	0	6	3	576	19	F	F	NA		F	T, R
Developmental Biology 440(2)	2018-08-15	doi.org/10.1016/j.ydbio.2018.04.010	Sefton	Developmental origin and morphogenesis of the diaphragm, an essential mammalian muscle	7	5	5	5	12	10	514	19	F	F	F		F	LSC
Developmental Biology 440(2)	2018-08-15	doi.org/10.1016/j.ydbio.2018.05.007	Xia	Lin28a regulates neurogliogenesis in mammalian retina through the Igf signaling	10	7	5	5	15	12	1590	22	F	F	F		F	F
Developmental Biology 440(1)	2018-08-01	doi.org/10.1016/j.ydbio.2018.04.028	Armstrong	Insulin signaling acts in adult adipocytes via GSK-3β and independently of	6	5	4	2	10	7	1254	15	F	F	F		F	LSC, F
Developmental Biology 440(1)	2018-08-01	doi.org/10.1016/j.ydbio.2018.04.026	Artap	Endocardial Hippo signaling regulates myocardial growth and cardiogenesis	6	5	3	3	9	8	939	31	F	F	F		F	LSC, F, T, R
Developmental Biology 440(1)	2018-08-01	doi.org/10.1016/j.ydbio.2018.05.003	Davies	ETS transcription factor Etsrp / Etv2 is required for lymphangiogenesis and directly regulates vegfr3 / flt4 expression	9	8	9	5	18	13	1634	297	F	F	F		F	LSC, T
Developmental Biology 440(1)	2018-08-01	doi.org/10.1016/j.ydbio.2018.04.014	Johnson	Drosophila nucleostemin 3 is required to maintain larval neuroblast proliferation	8	8	0	0	8	8	469	33	F	F	F		F	LSC
Developmental Biology 440(1)	2018-08-01	doi.org/10.1016/j.ydbio.2018.04.020	Ramalingam	Disparate levels of beta-catenin activity determine nephron progenitor cell fate	7	7	10	10	17	17	702	0	F	F	F		F	LSC, T, R
Developmental Biology 439(2)	2018-07-15	doi.org/10.1016/j.ydbio.2018.04.022	Monteiro	Transcriptomics of dorso-ventral axis determination in Xenopus tropicalis	6	2	4	1	10	3	1400	0	F	F	NA		F	T, reflected
Developmental Biology 439(2)	2018-07-15	doi.org/10.1016/j.ydbio.2018.04.012	Newman	Foxd1 is required for terminal differentiation of anterior hypothalamic neuronal subtypes	6	5	2	2	8	7	1123	20	F	F	F		F	F, T, R
Developmental Biology 439(2)	2018-07-15	doi.org/10.1016/j.ydbio.2018.04.015	Srivillibhuthur	TFAM is required for maturation of the fetal and adult intestinal epithelium	6	6	2	2	8	8	1327	245	P	P	F	F	F	F, T, R, TEM
Developmental Biology 439(2)	2018-07-15	doi.org/10.1016/j.ydbio.2018.04.021	Womble	The left-right asymmetry of liver lobation is generated by Pitx2c-mediated asymmetries in the hepatic diverticulum	9	8	0	0	9	8	859	27	F	F	F		F	LSC, T, R,
Developmental Biology 439(1)	2018-07-01	doi.org/10.1016/j.ydbio.2018.04.006	Sriskanthadevan-Pirahas	The EGF/Ras pathway controls growth in Drosophila via ribosomal RNA synthesis	5	4	2	0	7	4	1075	0	F	F	F		F	F (LSC?), T
Developmental Biology 439(1)	2018-07-01	doi.org/10.1016/j.ydbio.2018.04.007	Vermillion	Spatial patterns of gene expression are unveiled in the chick primitive streak by ordering single-cell transcriptomes	6	0	3	0	9	0	1789	0	NA	NA	NA		NA
Developmental Biology 439(1)	2018-07-01	doi.org/10.1016/j.ydbio.2018.04.005	Ward	The role of the notochord in amniote vertebral column segmentation (claudio Stern)	10	9	0	0	10	9	2002	27	F	F	NA		F	OPT, T
Developmental Biology 439(1)	2018-07-01	doi.org/10.1016/j.ydbio.2018.04.011	Xu	Self-restrained regulation of stem cell niche activity by niche components in the Drosophila testis	4	4	6	6	10	10	1084	19	F	F	F		F	LSC
																			18 LSC/SDC	11 F	14 T
				Total 30 articles	225	179	124	96	349	275	39749	1687					P/F ratio=3.5%
				Imaging containing articles (29)	219	179	121	96			37960	1687
					IF/F=79.6%		SIF/SF=77.0%
					TIF/TF=78.7%						IMM/MM=3.9%	IMM/Article=51.3
				Red font: no imaging materials and methods
				Pink fill: no imaging articles
				Blue fill: imaging articles not evaluated

## Sheet: Development
Journal volume (issue)	Pub Date	DOI	Author	Title	Figures	Imaging figures	Supp Figs	Supp Imaging Figs	Total Figs	Total I Figs	Total text M&M, words	Text Imaging, words	Objective lens	Digitization	Spectral settings	EM Score	Global score	Imaging modalities	Panels	Imaging panels
Development 145(18)	2018-09-15	doi:10.1242/dev.161398	Furuya	ANGUSTIFOLIA contributes to the regulation of three-dimensional morphogenesis in the liverwort Marchantia polymorpha	7	6	14	12	21	18	2152	144	F	F	P	F	F	LSC, F, MCT, SEM
Development 145(18)	2018-09-15	doi:10.1242/dev.167221	Kastl	Disrupting Hedgehog Cardin–Weintraub sequence and positioning changes cellular differentiation and compartmentalization in vivo	9	7	9	7	18	14	1131	22	F	F	F		F	LSC
Development 145(18)	2018-09-15	doi:10.1242/dev.164830	Jin	Enpp1 inhibits ectopic joint calcification and maintains articular chondrocytes by repressing hedgehog signaling	6	6	4	4	10	10	1290	18	F	F	F		F	F, T, XRY
Development 145(18)	2018-09-15	doi:10.1242/dev.168112	Casal	Planar cell polarity the prickle gene acts independently on both	7	7	6	4	13	11	273	35	F	F	NA		F	T
Development 145(18)	2018-09-15	doi:10.1242/dev.147769	Janesick	RARγ is required for mesodermal gene expression prior to gastrulation in Xenopus	6	5	5	4	11	9	876	29	P	F	F		F	LSC
Development 145(18)	2018-09-15	doi:10.1242/dev.162115	Bankaitis	ROCK-nmMyoII, Notch and Neurog3 gene-dosage link epithelial morphogenesis with cell fate in the pancreatic endocrine-progenitor niche	7	7	17	16	24	23	539	66	F	F	F		F	LSC, SIM
Development 145(18)	2018-09-15	doi:10.1242/dev.166462	Sakakibara	Role of SmcHD1 in establishment of epigenetic states required	6	3	3	2	9	5	1306	0	F	F	F		F	T, R, F, LSC
Development 145(18)	2018-09-15	doi:10.1242/dev.164897	Park	RPM-1 and DLK-1 regulate pioneer axon outgrowth by controlling Wnt signaling	8	5	1	0	9	5	678	76	P	P	F		P	F
Development 145(17)	2018-09-01	doi:10.1242/dev.163303	Hu	Glypican 4 and Mmp14 interact in regulating the migration of anterior endodermal cells by limiting extracellularmatrix deposition	8	8	8	8	16	16	1851	281	P	P	F		P	LSC, F, T, R	59	55
Development 145(17)	2018-09-01	doi:10.1242/dev.162701	Jardin	BMP- and neuropilin 1-mediated motor axon navigation relies on spastin alternative translation pancreas in Hes1 mutant mice	7	7	2	2	9	9	1924	221	P	F	F		F	LSC, SDC, SIM, R,	75	63
Development 145(17)	2018-09-01	doi:10.1242/dev.163568	Jorgensen	Neurog3-dependent pancreas dysgenesis causes ectopic	6	6	5	5	11	11		74	P	F	F		F	LSC	61	58
Development 145(17)	2018-09-01	doi:10.1242/dev.168369	Kawade	The cytochrome P450 CYP77A4 is involved in auxin-mediated patterning of the Arabidopsis thaliana embryo	7	6	9	6	16	12	1071	101	F	F	F		F	LSC, R, DIC	88	83
Development 145(17)	2018-09-01	doi:10.1242/dev.165340	Kim	Rnf220 cooperates with Zc4h2 to specify spinal progenitor domains	10	7	5	2	15	9	1112	12	F	F	F		F	F, T	41	19
Development 145(17)	2018-09-01	doi:10.1242/dev.163279	Kinold	Sidestep-induced neuromuscular miswiring causes severe locomotion defects in Drosophila larvae	7	7	3	3	10	10	1211	355	P	P	F		P	LSC, T, R	52	52
Development 145(17)	2018-09-01	doi:10.1242/dev.162529	Kurabayasi	The LPA-LPA4 axis is required for establishment of bipolar morphology and radial migration of newborn cortical neurons	9	9	12	11	21	20	1736	80	F	F	F		F	LSC, F	41	39
Development 145(17)	2018-09-01	doi:10.1242/dev.163535	Liu	Nodal signaling has dual roles in fate specification and directed migration during germ layer segregation in zebrafish	5	5	10	6	15	11	1418	183	P	P	F		P	SDC	42	24
Development 145(17)	2018-09-01	doi:10.1242/dev.165092	Liu	Rasip1 controls lymphatic vessel lumen maintenance by regulating endothelial cell junctions	10	9	13	12	23	21	1189	40	F	F	F		F	LSC	58	54
Development 145(17)	2018-09-01	doi:10.1242/dev.167361	Mohan	Embryonic Tbx3+ cardiomyocytes form the mature cardiac conduction system by progressive fate restriction	9	8	8	7	17	15	2164	52	F	F	F		F	LSC, F	38	30
Development 145(17)	2018-09-01	doi:10.1242/dev.159558	Reuveny	Ma2/d promotes myonuclear positioning and association with the sarcoplasmic reticulum	8	7	4	2	12	9	1218	192	P	F	F		F	LSC, SDC	39	36
Development 145(17)	2018-09-01	doi:10.1242/dev.166801	Sebo	A mesodermal fate map for adipose tissue	8	6	6	3	14	9	707	84	F	F	F		F	LSC	47	45
Development 145(16)	2018-08-15	doi:10.1242/dev.165597	Garcı́a-León	Dynamic regulation of NOTCH1 activation and Notch ligand expression in human thymus development	7	7	3	3	10	10	699	89	P	F	F		F	LSC
Development 145(16)	2018-08-15	doi:10.1242/dev.160614	Jan	Distinct prophase arrest mechanisms in human male meiosis	6	2	2	2	8	4	1298	49	F	P	F		F	F, T
Development 145(16)	2018-08-15	doi:10.1242/dev.162305	Lee	Integrin α2 marks a niche of trophoblast progenitor cells in first trimester human placenta	6	4	3	1	9	5	1119	21	F	F	F		F	LSC
Development 145(16)	2018-08-15	doi:10.1242/dev.164038	Menon	Single-cell analysis of progenitor cell dynamics and lineage specification in the human fetal kidney	4	2	4	2	8	4	1523	15	F	F	F		F	F
Development 145(16)	2018-08-15	doi:10.1242/dev.165431	Nakajima	Modeling human somite development and fibrodysplasia ossificans progressiva with induced pluripotent stem cells	6	5	27	11	33	16	1902	34	F	F	F		F	F, T, R
Development 145(16)	2018-08-15	doi:10.1242/dev.162214	Ogura	Three-dimensional induction of dorsal, intermediate and ventral spinal cord tissues from human pluripotent stem cells	6	6	8	6	14	12	1337	78	F	F	F		F	LSC, F, R, P
Development 145(16)	2018-08-15	doi:10.1242/dev.165480	Ramond	Understanding human fetal pancreas development using subpopulation sorting, RNA sequencing and single-cell profiling	7	0	12	3	19	3	2049	0	F	F	F		F	F
Development 145(16)	2018-08-15	doi:10.1242/dev.166215	Verrier	Neural differentiation, selection and transcriptomic profiling of human neuromesodermal progenitor-like cells in vitro	4	1	8	3	12	4	2290	163	F	P	F		F	LSC, F
					94	85													20 LSC	14 F	7 T
					290	243	211	147	407	305	36063	2514					P/F ratio=14.3%		641	558
																			IP/P=87.1%
					IF/F=80.6%			SIF/SF=69.7%				IMM/MM=6.97%
					TIF/TF=74.9%
					n= 28 papers

## Sheet: Developmental Cell
Journal volume (issue)	Pub Date	DOI	Author	Title	Figures	Imaging figures	Supp Figs	Supp Imaging Figs	Total Figs	Total I Figs	Total text M&M, words	Text Imaging, words	Objective lens	Digitization	Spectral settings	EM score	Global score	Imaging modalities
Developmental Cell 46 (6)	2018-09-24	doi.org/10.1016/j.devcel.2018.08.001	Alpar	Spatially Restricted Regulation of Spatzle/Toll Signaling during Cell Competition	6	5	7	6	13	11	2464	33	F	F	F		F	LSC, T
Developmental Cell 46 (6)	2018-09-24	doi.org/10.1016/j.devcel.2018.05.028	Brankatschk	A Temperature-Dependent Switch in Feeding Preference Improves Drosophila Development and Survival in the Cold	4	1	4	1	8	2	1955	16	F	F	NA		F	R
Developmental Cell 46 (6)	2018-09-24	doi.org/10.1016/j.devcel.2018.07.023	Chee	Intrinsic Xenobiotic Resistance of the Intestinal Stem Cell Niche	7	5	3	3	10	8	1879	112	F	F	F		F	LSC, T
Developmental Cell 46 (6)	2018-09-24	doi.org/10.1016/j.devcel.2018.08.006	Leikina	Myomaker and Myomerger Work Independently to Control Distinct Steps of Membrane Remodeling during Myoblast Fusion	7	6	7	6	14	12	4440	121	F	F	F		F	LSC
Developmental Cell 46 (6)	2018-09-24	doi.org/10.1016/j.devcel.2018.08.008	Singh	Opposing Action of Hedgehog and Insulin Signaling Balances Proliferation and Autophagy to Determine Follicle Stem Cell Lifespan	6	5	0	0	6	5	1946	47	P	F	F		F	LSC
Developmental Cell 46 (6)	2018-09-24	doi.org/10.1016/j.devcel.2018.07.014	Wang	Sequestration of a Transposon-Derived siRNA by a Target Mimic Imprinted Gene Induces Postzygotic Reproductive Isolation in Arabidopsis	8	4	5	4	13	8	1825	107	F	F	P		F	LSC, F, R, DIC
Developmental Cell 46 (6)	2018-09-24	doi.org/10.1016/j.devcel.2018.07.015	Wang	Anosmin1 Shuttles Fgf to Facilitate Its Diffusion, Increase Its Local Concentration, and Induce Sensory Organs	8	7	8	7	16	14	7825	1172	P	F	P		P	LSC, F, T, FCS, SIM, RLSC, LS
Developmental Cell 46 (6)	2018-09-24	doi.org/10.1016/j.devcel.2018.08.024	Yin	Spatiotemporal Coordination of FGF and Shh Signaling Underlies the Specification of Myoblasts in the Zebrafish Embryo	7	6	7	7	14	13	1005	129	F	F	F		F	LSC, LS
Developmental Cell 46 (5)	2018-09-10	doi.org/10.1016/j.devcel.2018.07.008	Galati	Trisomy 21 Represses Cilia Formation and Function	4	4	4	4	8	8	2195	79	P	P	F		P	F, SDC
Developmental Cell 46 (5)	2018-09-10	doi.org/10.1016/j.devcel.2018.07.006	Kolundzic	FACT Sets a Barrier for Cell Fate Reprogramming in Caenorhabditis elegans and Human Cells	6	5	6	3	12	8	5735	0	F	F	F		F	LSC, F, T, DIC
Developmental Cell 46 (5)	2018-09-10	doi.org/10.1016/j.devcel.2018.08.009	Kulkarni	WDR5 Stabilizes Actin Architecture to Promote Multiciliated Cell Formation	7	7	7	6	14	13	824	13	F	F	F		F	LSC
Developmental Cell 46 (5)	2018-09-10	doi.org/10.1016/j.devcel.2018.08.002	Sivakumar	Midgut Laterality Is Driven by Hyaluronan on the Right	8	8	8	8	16	16	1761	38	F	F	F		F	LSC, F, SIM
Developmental Cell 46 (5)	2018-09-10	doi.org/10.1016/j.devcel.2018.07.022	Tanimura	GATA/Heme Multi-omics Reveals a Trace Metal-Dependent Cellular Differentiation Mechanism	7	1	7	1	14	2	1998	0	F	F	F		F	T
Developmental Cell 46 (5)	2018-09-10	doi.org/10.1016/j.devcel.2018.07.020	Tokuhiro	Glycan-Independent Gamete Recognition Triggers Egg Zinc Sparks and ZP2 Cleavage to Prevent Polyspermy	7	7	4	2	11	9	2183	134	F	F	F		F	LSC
Developmental Cell 46 (5)	2018-09-10	doi.org/10.1016/j.devcel.2018.08.005	Wu	Il34-Csf1r Pathway Regulates the Migration and Colonization of Microglial Precursors	5	5	5	5	10	10	1931	229	F	F	F		F	LSC, T
Developmental Cell 46 (4)	2018-08-20	doi.org/10.1016/j.devcel.2018.06.025	Calabretta	Loss of PRMT5 Promotes PDGFRa Degradation during Oligodendrocyte Differentiation and Myelination	7	3	5	0	12	3	2154	16	F	F	F		F	LSC
Developmental Cell 46 (4)	2018-08-20	doi.org/10.1016/j.devcel.2018.06.024	Conine	Small RNAs Gained during Epididymal Transit of Sperm Are Essential for Embryonic Development in Mice	7	2	6	0	13	2	1868	12	F	F	NA		F	T, R
Developmental Cell 46 (4)	2018-08-20	doi.org/10.1016/j.devcel.2018.07.011	Corcoles-Saez	Essential Function of Mec1, the Budding Yeast ATM/ATR Checkpoint-Response Kinase, in Protein Homeostasis	4	1	3	1	7	2	457	22	P	P	F		P	F
Developmental Cell 46 (4)	2018-08-20	doi.org/10.1016/j.devcel.2018.07.003	Lee	A Regulatory Response to Ribosomal Protein Mutations Controls Translation, Growth, and Cell Competition	7	5	5	4	12	9	1593	84	F	F	F		F	LSC, T
Developmental Cell 46 (4)	2018-08-20	doi.org/10.1016/j.devcel.2018.07.012	Li	PINK1 and PARK2 Suppress Pancreatic Tumorigenesis through Control of Mitochondrial Iron-Mediated Immunometabolism	7	2	7	3	14	5	2332	44	F	F	F		F	LSC, T
Developmental Cell 46 (4)	2018-08-20	doi.org/10.1016/j.devcel.2018.07.007	Makihara	Polarized Dock Activity Drives Shh-Mediated Axon Guidance	7	6	6	1	13	7	2509	87	F	F	F		F	LSC, P
Developmental Cell 46 (4)	2018-08-20	doi.org/10.1016/j.devcel.2018.06.023	Sharma	Small RNAs Are Trafficked from the Epididymis to Developing Mammalian Sperm	6	1	5	1	11	2	3791	0	F	F	NA		F	T, P
Developmental Cell 46 (4)	2018-08-20	doi.org/10.1016/j.devcel.2018.07.021	Zhang	Melanocortin Receptor 4 Signaling Regulates Vertebrate Limb Regeneration	7	5	7	6	14	11	2384	28	F	F	F		F	LSC, F, T, R, DIC
Developmental Cell 46 (3)	2018-08-06	doi.org/10.1016/j.devcel.2018.07.004	Lin	The hpRNA/RNAi Pathway Is Essential to Resolve Intragenomic Conflict in the Drosophila Male Germline	7	2	7	1	14	3	2039	28	F	F	F		F	LSC
Developmental Cell 46 (3)	2018-08-06	doi.org/10.1016/j.devcel.2018.07.001	Pathak	Retrograde Degenerative Signaling Mediated by the p75 Neurotrophin Receptor Requires p150Glued Deacetylation by Axonal HDAC1	7	5	3	2	10	7	3343	103	F	F	F		F	LSC, F
Developmental Cell 46 (3)	2018-08-06	doi.org/10.1016/j.devcel.2018.06.019	Rasmussen	Fish Scales Dictate the Pattern of Adult Skin Innervation and Vascularization	7	7	7	7	14	14	1096	183	F	F	F	F	F	LSC, F, TEM
Developmental Cell 46 (3)	2018-08-06	doi.org/10.1016/j.devcel.2018.07.009	Roovers	Tdrd6a Regulates the Aggregation of Buc into Functional Subcellular Compartments that Drive Germ Cell Specification	7	6	7	4	14	10	4115	290	P	F	F	F	F	LSC, F, TEM
Developmental Cell 46 (3)	2018-08-06	doi.org/10.1016/j.devcel.2018.06.020	Sugioka	Combinatorial Contact Cues Specify Cell Division Orientation by Directing Cortical Myosin Flows	7	7	7	4	14	11	2225	207	F	F	F		F	SDC, F, DIC
Developmental Cell 46 (3)	2018-08-06	doi.org/10.1016/j.devcel.2018.06.028	Sznurkowska	Defining Lineage Potential and Fate Behavior of Precursors during Pancreas Development	7	6	7	6	14	12	3073	25	F	F	F		F	LSC
Developmental Cell 46 (3)	2018-08-06	doi.org/10.1016/j.devcel.2018.04.023	Tam	The UPR Activator ATF6 Responds to Proteotoxic and Lipotoxic Stress by Distinct Mechanisms	7	4	7	5	14	9	3579	328	F	P	F	F	F	F, TEM
Developmental Cell 46 (3)	2018-08-06	doi.org/10.1016/j.devcel.2018.07.002	Wong	Programmed DNA Breaks Activate the Germline Genome in Caenorhabditis elegans	6	6	3	3	9	9	2224	62	F	F	F		F	LSC
Developmental Cell 46 (3)	2018-08-06	doi.org/10.1016/j.devcel.2018.06.017	Xu	Yorkie Functions at the Cell Cortex to Promote Myosin Activation in a Non-transcriptional Manner	7	7	7	7	14	14	1184	95	F	F	F		F	LSC	26 LSC	13 F	11 T
					211	151	181	118	392	269	79932	3844
					IF/F=71.6%		SIF/SF=65.2%										P/F ratio=9.4%
					TIF/TF=68.6%						IMM/MM=4.81%
					n=32 papers
					NOTE: DC has a lot of M&M information in key resource tables not included in the M&M word count

## Sheet: JCB
Journal volume (issue)	Pub Date	DOI	Author	Title	Figures	Imaging figures	Supp Figs	Supp Imaging Figs	Total Figs	Total I Figs	Total text M&M, words	Text Imaging, words	Objective lens	Digitization	Spectral settings	EM score	Global score	Imaging modalities
J. Cell Biology 219 (9)	2018-09-03	doi.org/10.1083/jcb.201711083	Cheng	Characterization of LAMP1-labeled nondegradative lysosomal and endocytic compartments in neurons	8	8	0	0	8	8	1752	158	P	F	F	F	F	LSC, TEM
J. Cell Biology 219 (9)	2018-09-03	doi.org/10.1083/jcb.201802102	Dandoulaki	Src activation by Chk1 promotes actin patch formation and prevents chromatin bridge breakage in cytokinesis	10	9	5	5	15	14	2903	188	P	F	F		F	LSC, F, P
J. Cell Biology 219 (9)	2018-09-03	doi.org/10.1083/jcb.201703120	Donnelly	Non-canonical Ret signaling augments p75-mediated cell death in developing sympathetic neurons	7	5	3	1	10	6	1969	83	F	F	F		F	T, F
J. Cell Biology 219 (9)	2018-09-03	doi.org/10.1083/jcb.201703196	Drummond	Actin polymerization controls cilia-mediated signaling	6	6	5	3	11	9	1089	59	F	F	F		F	LSC, F
J. Cell Biology 219 (9)	2018-09-03	doi.org/10.1083/jcb.201710058	Frank	p190 RhoGAP promotes contact inhibition in epithelial cells by repressing YAP activity	10	7	5	5	15	12	3138	10	F	F	F		F	LSC, SDC
J. Cell Biology 219 (9)	2018-09-03	doi.org/10.1083/jcb.201802027	Hofbauer	The molecular recognition of phosphatidic acid by an amphipathic helix in Opi1	6	2	5	2	11	4	3727	60	P	F	P		P	LSC
J. Cell Biology 219 (9)	2018-09-03	doi.org/10.1083/jcb.201802088	Jones	Cell adhesion is regulated by CDK1 during the cell cycle	5	5	4	4	9	9	3241	245	F	F	F		F	LSC, F, T
J. Cell Biology 219 (9)	2018-09-03	doi.org/10.1083/jcb.201712029	Jores	Cytosolic Hsp70 and Hsp40 chaperones enable the biogenesis of mitochondrial β-barrel proteins	6	0	4	0	10	0	3054	0	NA	NA	NA		NA
J. Cell Biology 219 (9)	2018-09-03	doi.org/10.1083/jcb.201710161	Kam	Desmoplakin maintains gap junctions by inhibiting Ras/MAPK and lysosomal degradation of connexin-43	8	7	4	1	12	8	1993	46	P	P	F		P	F
J. Cell Biology 219 (9)	2018-09-03	doi.org/10.1083/jcb.201712085	Srpan	Shedding of CD16 disassembles the NK cell immune synapse and boosts serial engagement of target cells	9	6	5	2	14	8	1974	189	P	F	F		F	LSC, RLSC
J. Cell Biology 219 (9)	2018-09-03	doi.org/10.1083/jcb.201711039	Yap	Degradation of dendritic cargos requires Rab7-dependent transport to somatic lysosomes	10	10	5	5	15	15	2697	335	P	F	F		F	LSC, SIM
J. Cell Biology 219 (9)	2018-09-03	doi.org/10.1083/jcb.201802023	Zobel	A NUMB–EFA6B–ARF6 recycling route controls apically restricted cell protrusions and mesenchymal motility	10	8	11	2	21	10	5090	653	P	F	P		P	LSC, F
J. Cell Biology 219 (9)	2018-09-03	doi.org/10.1083/jcb.201804166	Zulkipli	Spindle rotation in human cells is reliant on a MARK2-mediated equatorial spindle-centering mechanism	7	7	4	3	11	10	676	167	P	P	F		P	F
J. Cell Biology 219 (8)	2018-08-06	doi.org/10.1083/jcb.201802080	Burdyniuk	F-Actin nucleated on chromosomes coordinates their capture by microtubules in oocyte meiosis	6	5	4	4	10	9	1453	161	P	P	F		P	LSC
J. Cell Biology 219 (8)	2018-08-06	doi.org/10.1083/jcb.201712117	Dharmat	SPA TA7 maintains a novel photoreceptor-specific zone in the distal connecting cilium	7	7	5	4	12	11	3178	471	F	F	P	P	F	T, SIM, STORM
J. Cell Biology 219 (8)	2018-08-06	doi.org/10.1083/jcb.201801039	Funabashi	Interaction of heterotrimeric kinesin-II with IFT-B–connecting tetramer is crucial for ciliogenesis	5	5	1	0	6	5	976	27	F	F	F		F	F
J. Cell Biology 219 (8)	2018-08-06	doi.org/10.1083/jcb.201710116	Gómez‑Sánchez	Atg9 establishes Atg2-dependent contact sites between the endoplasmic reticulum and phagophores	10	8	5	5	15	13	3571	163	P	P	F	P	P	F, CryoEM
J. Cell Biology 219 (8)	2018-08-06	doi.org/10.1083/jcb.201706041	Hilfenhaus	Vav3-induced cytoskeletal dynamics contribute to heterotypic properties of endothelial barriers	7	5	6	4	13	9	2198	30	F	F	F		F	LSC, T
J. Cell Biology 219 (8)	2018-08-06	doi.org/10.1083/jcb.201712113	Hung	Endosomal TLR3, TLR7, and TLR8 control neuronal morphology through different transcriptional programs	10	5	2	0	12	5	2673	191	P	F	F		F	LSC, SDC, F
J. Cell Biology 219 (8)	2018-08-06	doi.org/10.1083/jcb.201710170	Kriebel	Extracellular vesicles direct migration by synthesizing and releasing chemotactic signals	8	4	5	3	13	7	3625	596	P	F	F	P	F	LSC, T, P, R, SBF
J. Cell Biology 219 (8)	2018-08-06	doi.org/10.1083/jcb.201711104	Lee	Actin filaments partition primary cilia membranes into distinct fluid corrals	8	5	2	1	10	6	3852	880	P	F	F		F	F, LSC, MPE
J. Cell Biology 219 (8)	2018-08-06	doi.org/10.1083/jcb.201802138	McIntosh	Microtubules grow by the addition of bent guanosine triphosphate tubulin to the tips of curved protofilaments	10	7	5	4	15	11	3428	491	NA	P	NA	P	P	CryoEM
J. Cell Biology 219 (8)	2018-08-06	doi.org/10.1083/jcb.201712177	Meng	GAT OR1-dependent recruitment of FLCN–FNIP to lysosomes coordinates Rag GTPase heterodimer nucleotide status in response to amino acids	9	6	4	3	13	9	1104	42	P	F	F		F	SDC
J. Cell Biology 219 (8)	2018-08-06	doi.org/10.1083/jcb.201710132	Messenger	A Ca2+-stimulated exosome release pathway in cancer cells is regulated by Munc13-4	7	7	2	2	9	9	1798	147	F	F	F	F	F	LSC, SIM-SR, TIRF, TEM
J. Cell Biology 219 (8)	2018-08-06	doi.org/10.1083/jcb.201706164	Mostofa	CLIP and cohibin separate rDNA from nucleolar proteins destined for degradation by nucleophagy	10	7	7	6	17	13	1004	89	F	F	F		F	F
J. Cell Biology 219 (8)	2018-08-06	doi.org/10.1083/jcb.201708091	Pfanzelter	Septins suppress the release of vaccinia virus from infected cells	10	10			10	10	1401	179	P	F	F		F	LSC, SDC, F
J. Cell Biology 219 (8)	2018-08-06	10.1083/jcb.201709055	Ripoll	Myosin VI and branched actin filaments mediate membrane constriction and fission of melanosomal tubule carriers	6	6	5	5	11	11	3323	690	P	P	F	P	P	SDC, F, SIM-SR, TEM, electron tomography
J. Cell Biology 219 (8)	2018-08-06	doi.org/10.1083/jcb.201703037	Sampayo	Fibronectin rescues estrogen receptor α from lysosomal degradation in breast cancer cells	9	7	5	4	14	11	3489	774	P	P	F		P	F, TIRF, STORM
J. Cell Biology 219 (8)	2018-08-06	doi.org/10.1083/jcb.201710094	Sikirzhytski	Microtubules assemble near most kinetochores during early prometaphase in human cells	9	8	2	2	11	10	1955	374	P	P	F	P	P	SDC, F, P, D, TEM
J. Cell Biology 219 (8)	2018-08-06	doi.org/10.1083/jcb.201710022	Wang	Integrin α4β7 switches its ligand specificity via distinct conformer-specific activation	5	0	5	0	10	0	2608	188	P	F	P		P	FLIM	20 LSC	16 F	5 T
					238	182	125	80	363	262	74939	7686
					IF/F=76.5%		SIF/SF=64%										P/F ratio=37.9%
					TIF/TF=72.2%						IMM/MM=8.5%
					n=30 papers
				Imaging papers=29	232	182	121	80			71885	7585
				Articles with no imaging (1)

## Sheet: JN
Journal volume (issue)	Pub Date	Digital Object Identifier (DOI)	Author	Title	Figures	Imaging figures	Supp Figs	Supp Imaging Figs	Total Figures	Total I Figures	Total text M&M, words	Text Imaging, words	Objective lens	Digitization	Spectral settings	EM score	Global score	Imaging modalities
J. Neuroscience 38(40)	2018-10-03	DOI:10.1523/JNEUROSCI.0440-18.2018	Itthipuripat	Having More Choices Changes How Human Observer Weight Stable Sensory Evidence	8	0			8	0	3304	0
J. Neuroscience 38(40)	2018-10-03	DOI:10.1523/JNEUROSCI.1702-17.2018	Amlien	The Lifespan Trajectory of the Encoding-Retrieval Flip: A Multimodal Examination of Medial Parietal Cortex Contributions to Episodic Memory	12	5			12	5	4087	575						MRI
J. Neuroscience 38(40)	2018-10-03	DOI:10.1523/JNEUROSCI.0369-18.2018	Auksztulewics	Not All Predictions Are Equal: “What” and “When” Predictions Modulate Activity in Auditory Cortex through Different Mechanisms	5	0			5	0	3306	0
J. Neuroscience 38(40)	2018-10-03	DOI:10.1523/JNEUROSCI.1211-18.2018	Benichoux	Across Species “Natural Ablation” Reveals the Brainstem Source of a Noninvasive Biomarker of Binaural Hearing	5	0			5	0	2086	0
J. Neuroscience 38(40)	2018-10-03	doi.org/10.1523/JNEUROSCI.0675-18.2018	Chariker	Rhythm and Synchrony in a Cortical Network Model	6	0			6	0	2122	0
J. Neuroscience 38(40)	2018-10-03	DOI:10.1523/JNEUROSCI.0569-18.2018	Crosby	Cholecystokinin Switches the Plasticity of GABA Synapses in the Dorsomedial Hypothalamus via Astrocytic ATP Release	6	1			6	1	1229	131	P	F	F		F	MPE
J. Neuroscience 38(40)	2018-10-03	DOI:10.1523/JNEUROSCI.0703-18.2018	de Voogd	Eye-Movement Intervention Enhances Extinction via Amygdala Deactivation	5	2			5	2	3502	140						MRI
J. Neuroscience 38(40)	2018-10-03	DOI:10.1523/JNEUROSCI.1566-18.2018	Ester	Retrospective Cues Mitigate Information Loss in Human Cortex during Working Memory Storage	8	0			8	0	2568	0
J. Neuroscience 38(40)	2018-10-03	DOI:10.1523/JNEUROSCI.0956-18.2018	Heredia	Postnatal Restriction of Activity-Induced Ca2+ Responses to Schwann Cells at the Neuromuscular Junction Are Caused by the Proximo-Distal Loss of Axonal Synaptic Vesicles during Developm	9	9			9	9	938	505	F	F	F	P	F	LSC, F, TEM
J. Neuroscience 38(40)	2018-10-03	DOI:10.1523/JNEUROSCI.1117-18.2018	Li	Distinct Co-Modulation Rules of Synapses and Voltage-Gated Currents Coordinate Interactions of Multiple Neuromodulators	9	0			9	0	2041	0
J. Neuroscience 38(40)	2018-10-03	DOI:10.1523/JNEUROSCI.0759-18.2018	Scott	Altered Auditory Processing, Filtering, and Reactivity in the Cntnap2 Knock-Out Rat Model for Neurodevelopmental Disorders	11	1			11	1	2367	308	F	F	NA		F	T
J. Neuroscience 38(40)	2018-10-03	DOI:10.1523/JNEUROSCI.0454-18.2018	Sharma	A Critical Role for Sorting Nexin 1 in the Trafficking of Metabotropic Glutamate Receptors	8	8			8	8	2381	23	P	F	F		F	LSC
J. Neuroscience 38(40)	2018-10-03	DOI:10.1523/JNEUROSCI.0734-18.2018	Taylor	Suppressing Interferon-γ Stimulates Microglial Responses and Repair of Microbleeds in the Diabetic Brain	8	7			8	7	2547	504	P	P	F		P	MPE
J. Neuroscience 38(40)	2018-10-03	DOI:10.1523/JNEUROSCI.0587-18.2018	van der Heijden	Active Sound Localization Sharpens Spatial Tuning in Human Primary Auditory Cortex	8	7			8	7	3409	269						MRI
J. Neuroscience 38(40)	2018-10-03	DOI:10.1523/JNEUROSCI.2800-17.2018	Ward	General Transformations of Object Representations in Human Visual Cortex	5	4			5	4	4259	98						MRI
J. Neuroscience 38(41)	2018-10-10	DOI:10.1523/JNEUROSCI.2519-17.2018	Amundson Huffmaster	Muscle Synergies Obtained from Comprehensive Mapping of the Cortical Forelimb Representation Using Stimulus Triggered Averaging of EMG Activity	6	0			6	0	2417	0
J. Neuroscience 38(41)	2018-10-10	DOI:10.1523/JNEUROSCI.0984-18.2018	Azzopardi	The Role of Cholinergic Midbrain Neurons in Startle and Prepulse Inhibition	8	1			8	1	2194	82	F	F	P		F	LSC
J. Neuroscience 38(41)	2018-10-10	DOI:10.1523/JNEUROSCI.0144-18.2018	Chang	Brief, But Not Prolonged, Pauses in the Firing of Midbrain Dopamine Neurons Are Sufficient to Produce a Conditioned Inhibitor	5	2			5	2	1716	40	F	F	F		F	LSC, F
J. Neuroscience 38(41)	2018-10-10	DOI:10.1523/JNEUROSCI.0789-18.2018	Cope	Microglia Play an Active Role in Obesity-Associated Cognitive Decline	9	7			9	7	3390	296	F	F	F	P	F	LSC, F, TEM
J. Neuroscience 38(41)	2018-10-10	DOI:10.1523/JNEUROSCI.1333-18.2018	Guo	Anterolateral Motor Cortex Connects with a Medial Subdivision of Ventromedial Thalamus through Cell Type-Specific Circuits, Forming an Excitatory Thalamo-Cortico-Thalamic Loop	8	5			8	5	1814	78	F	F	P		F	F
J. Neuroscience 38(41)	2018-10-10	DOI:10.1523/JNEUROSCI.1009-18.2018	Hoffmann	Medial Auditory Thalamus Is Necessary for Expression of Auditory Trace Eyelid Conditioning	7	2			7	2	2847	12	F	F	NA		F	R
J. Neuroscience 38(41)	2018-10-10	DOI:10.1523/JNEUROSCI.0735-18.2018	Kawaguchi	Differentiating between Models of Perceptual Decision Making Using Pupil Size Inferred Confidence	9	0			9	0	3327	0
J. Neuroscience 38(41)	2018-10-10	DOI:10.1523/JNEUROSCI.1116-18.2018	Kutlu	Granulocyte Colony Stimulating Factor Enhances Reward Learning through Potentiation of Mesolimbic Dopamine System Function	6	0			6	0	1854	0
J. Neuroscience 38(41)	2018-10-10	DOI:10.1523/JNEUROSCI.0323-18.2018	Lu	Presynaptic Inhibition of Primary Nociceptive Signals to Dorsal Horn Lamina I Neurons by Dopamine	10	3			10	3	2048	73	F	P	F		F	F, D
J. Neuroscience 38(41)	2018-10-10	DOI:10.1523/JNEUROSCI.0819-18.2018	Marion	Experimental Traumatic Brain Injury Identifies Distinct Early and Late Phase Axonal Conduction Deficits of White Matter Pathophysiology, and Reveals Intervening Recovery	7	6			7	6	2904	297	P	F	F	F	F	LSC, MPE, F, TEM
J. Neuroscience 38(41)	2018-10-10	DOI:10.1523/JNEUROSCI.0897-18.2018	Matsumoto	Retinal Detachment-Induced Müller Glial Cell Swelling Activates TRPV4 Ion Channels and Triggers Photoreceptor Death at Body Temperature	11	7			11	7	1719	75	F	F	F		F	LSC, F
J. Neuroscience 38(41)	2018-10-10	DOI:10.1523/JNEUROSCI.0516-18.2018	McPherson	Regulators of G-Protein Signaling (RGS) Proteins Promote Receptor Coupling to G-Protein-Coupled Inwardly Rectifying Potassium (GIRK) Channels	4	0			4	0	934	0
J. Neuroscience 38(41)	2018-10-10	DOI:10.1523/JNEUROSCI.1519-18.2018	Murata	Thalamus Controls Development and Expression of Arousal States in Visual Cortex	7	0			7	0	1752	0
J. Neuroscience 38(41)	2018-10-10	DOI:10.1523/JNEUROSCI.1314-18.2018	Torrecillos	Modulation of Beta Bursts in the Subthalamic Nucleus Predicts Motor Performance	6	0			6	0	2567	0
J. Neuroscience 38(41)	2018-10-10	DOI:10.1523/JNEUROSCI.0860-18.2018	Zhao	Sarcoglycan Alpha Mitigates Neuromuscular Junction Decline in Aged Mice by Stabilizing LRP4	11	7			11	7	1621	19	F	F	F		F	LSC	8 LSC	7F	1 T
					227	84					73250	3525
				All articles (30):		IF/I=37%						MI/M=4.77%
				Articles containing imaging (18):	148	IF/I=56.7%					44972	3525
				Articles with no imaging (12)
				Articles excluded (3), imaging MRI we cannot evaluate
				Articles containing imaging we can evaluate (14):	123	68					33217	2583
				Articles containing imaging we can evaluate (14):	123	IF/I=55.3%						MI/M=7.68%					P/F ratio: 7.1%

## Sheet: Nature Immunology
Journal volume (issue)	Pub Date	Digital Object Identifier (DOI)	Author	Title	Figures	Imaging figures	Supp Figs	Supp Imaging Figs	Total Figs	Total I Figs	Total text M&M, words	Text Imaging, words	Objective lens	Digitization	Spectral settings	EM Score	Global score	Imaging modalities
Nature Immunology 19(8)	2018-08-01	doi.org/10.1038/s41590-018-0156-5	Akkaya	Second signals rescue B cells from activationinduced mitochondrial dysfunction and death	8	3	6	1	14	4	3011	196	F	F	F	F	F	LSC, TIRF, STED, TEM
Nature Immunology 19(8)	2018-08-01	doi.org/10.1038/s41590-018-0144-9	Castro	The transcription factor Rfx7 limits metabolism of NK cells and promotes their maintenance and immunity	8	1	7	1	15	2	3249	20	F	F	F		F	Flow imaging
Nature Immunology 19(8)	2018-08-01	doi.org/10.1038/s41590-018-0161-8	Crawford	Epithelial damage and tissue γδ T cells promote a unique tumor-protective IgE response	7	2	7	2	14	4	2899	86	F	F	F		F	LSC, F, T
Nature Immunology 19(8)	2018-08-01	doi.org/10.1038/s41590-018-0157-4	Newtom	Maintenance of CD4 T cell fitness through regulation of Foxo1	8	4	8	2	16	6	2809	148	F	F	F		F	LSC, F
Nature Immunology 19(8)	2018-08-01	doi.org/10.1038/s41590-018-0160-9	Richard	T cell cytolytic capacity is independent of initial stimulation strength	7	0	8	0	15	0	3193	0
Nature Immunology 19(8)	2018-08-01	doi.org/10.1038/s41590-018-0162-7	Rossboth	TCRs are randomly distributed on the plasma membrane of resting antigen-experienced T cells	5	4	9	9	14	13	3522	892	P	P	P		P	TIRF, STORM, PALM, STED
Nature Immunology 19(8)	2018-08-01	doi.org/10.1038/s41590-018-0155-6	Salerno	Translational repression of pre-formed cytokineencoding mRNA prevents chronic activation of memory T cells	7	0	8	0	15	0	2302	0
									0	0
Nature Immunology 19(9)	2018-09-01	doi.org/10.1038/s41590-018-0184-1	Cuartero	Control of inducible gene expression links cohesin to hematopoietic progenitor self-renewal and differentiation	8	0	6	1	14	1	2989	81	F	P	F		F	LSC
Nature Immunology 19(9)	2018-09-01	doi.org/10.1038/s41590-018-0185-0	Cuatrini	Endogenous glucocorticoids control host resistance to viral infection through the tissue-specific regulation of PD-1 expression on NK cells	7	3	8	0	15	3	1864	19	F	F	NA		F	T
Nature Immunology 19(9)	2018-09-01	doi.org/10.1038/s41590-018-0179-y	Gavin	PLD3 and PLD4 are single-stranded acid exonucleases that regulate endosomal nucleic-acid sensing	7	2	8	1	15	3	2461	9	F	F	F		F	F, T
Nature Immunology 19(9)	2018-09-01	doi.org/10.1038/s41590-018-0180-5	Kardava	IgG3 regulates tissue-like memory B cells in HIV-infected individuals	7	2	5	0	12	2	2047	52	F	F	F		F	F, TIRF
Nature Immunology 19(9)	2018-09-01	doi.org/10.1038/s41590-018-0178-z	Kong	Disruption of an antimycobacterial circuit between dendritic and helper T cells in human SPPL2a deficiency	7	1	7	0	14	1	4019	12	F	F	F		F	Flow Imaging
Nature Immunology 19(9)	2018-09-01	doi.org/10.1038/s41590-018-0176-1	Lau	Epigenetic control of innate and adaptive immune memory	6	0	6	0	12	0	2640	0
Nature Immunology 19(9)	2018-09-01	doi.org/10.1038/s41590-018-0181-4	Milpied	Human germinal center transcriptional programs are de-synchronized in B cell lymphoma	7	0	7	0	14	0	3609	0
Nature Immunology 19(9)	2018-09-01	doi.org/10.1038/s41590-018-0182-3	Preite	Hyperactivated PI3Kδ promotes self and commensal reactivity at the expense of optimal humoral immunity	8	3	7	1	15	4	3726	249	F	P	F		F	LSC, T
Nature Immunology 19(9)	2018-09-01	doi.org/10.1038/s41590-018-0177-0	Takatsuka	IL-9 receptor signaling in memory B cells regulates humoral recall responses	7	0	7	0	14	0	1655	0
									0	0
Nature Immunology 19(10)	2018-10-01	doi.org/10.1038/s41590-018-0200-5	Aschenbrenner	An immunoregulatory and tissue-residency program modulated by c-MAF in human TH17 cells	7	0	8	0	15	0	2690	0
Nature Immunology 19(10)	2018-10-01	doi.org/10.1038/s41590-018-0207-y	Huang	NKILA lncRNA promotes tumor immune evasion by sensitizing T cells to activation-induced cell death	7	4	8	6	15	10	4318	114	F	F	F		F	LSC, F, T, BLI, PET-CT
Nature Immunology 19(10)	2018-10-01	doi.org/10.1038/s41590-018-0209-9	Jelencic	NK cell receptor NKG2D sets activation threshold for the NCR1 receptor early in NK cell development	6	0	6	1	12	1	1948	25						XRY
Nature Immunology 19(10)	2018-10-01	doi.org/10.1038/s41590-018-0202-3	Kato	Infection perturbs Bach2- and Bach1-dependent erythroid lineage ‘choice’ to cause anemia	8	0	8	1	16	1	1722	0
Nature Immunology 19(10)	2018-10-01	doi.org/10.1038/s41590-018-0201-4	Ricardo-Gonzalez	Tissue signals imprint ILC2 identity with anticipatory function	7	0	8	0	15	0	1186	0
Nature Immunology 19(10)	2018-10-01	doi.org/10.1038/s41590-018-0203-2	Sato	Combating herpesvirus encephalitis by potentiating a TLR3–mTORC2 axis	7	5	7	4	14	9	1874	35	F	F	F		F	LSC, T
Nature Immunology 19(10)	2018-10-01	doi.org/10.1038/s41590-018-0211-2	Zeng	Sex-hormone-driven innate antibodies protect females and infants against EPEC infection	8	4	7	1	15	5	3265	405	F	P	F		F	SDC, BLI, FL, XRY, R
									0	0
Nature Immunology 19(11)	2018-11-01	doi.org/10.1038/s41590-018-0222-z	Inoue	Arginine methylation controls the strength of γc-family cytokine signaling in T cell maintenance	7	0	6	0	13	0	2063	0
Nature Immunology 19(11)	2018-11-01	doi.org/10.1038/s41590-018-0206-z	Jie	NIK signaling axis regulates dendritic cell function in intestinal immunity and homeostasis	8	3	9	1	17	4	2448	68	F	F	F		F	LSC, T, R
Nature Immunology 19(11)	2018-11-01	doi.org/10.1038/s41590-018-0234-8	Johanson	Transcription-factor-mediated supervision of global genome architecture maintains B cell identity	5	0	3	0	8	0	2973	0
Nature Immunology 19(11)	2018-11-01	doi.org/10.1038/s41590-018-0229-5	Patel	Unique pattern of neutrophil migration and function during tumor progression	8	4	8	1	16	5	2565	83	F	F	NA		F	P, BLI
Nature Immunology 19(11)	2018-11-01	doi.org/10.1038/s41590-018-0227-7	Renner	Characterization of a potent and highly unusual minimally enhancing antibody directed against dengue virus	6	1	6	1	12	2	2011	214				P	P	CryoEM
Nature Immunology 19(11)	2018-11-01	doi.org/10.1038/s41590-018-0232-x	Ryu	Fibrin-targeting immunotherapy protects against neuroinflammation and neurodegeneration	8	6	9	4	17	10	3814	216	F	F	F		F	LSC, F, MPE, T
					206	52	207	38	413	90	78872	2924							11 LSC	5 F	8 T
				Articles containing imaging (18):	132	52	132	38			52891
				Note there is also a Nature Research Life Science Reporting Summary, that includes a Flow Cytometry Reporting Summmary with detailed instrument and software setting questions
				All articles (29):		IF/F=25.24%		SIF/SF=18.35	TIF/TF=21.79%			IT/T=3.7%					P/F ratio: 11.1%
				Articles containing imaging (19):		IF/F=52/132=39.4%		IF/F=38/132=28.78%				IT/T=5.52%
				Articles with no imaging (10)
				Articles excluded (1), imaging X-ray we cannot evaluate

## Sheet: Biophysical J
Journal volume (issue)	Pub Date	Digital Object Identifier (DOI)	Author	Title	Figures	Imaging figures	Supp Figs	Supp Imaging Figs	Total Figs	Total I Figs	Total text M&M, words	Text Imaging, words	Objective lens	Digitization	Spectral settings	EM score	Global score	Imaging modalities
Biophysical J. 116(1)	2019-01-08	doi.org/10.1016/j.bpj.2018.11.019	Bandyopahyay	Contact Order Is a Determinant for the Dependence of GFP Folding on the Chaperonin GroEL	5	1	3	0	8	1	1599	54	NA	F	P		P	F
Biophysical J. 116(1)	2019-01-08	doi.org/10.1016/j.bpj.2018.11.3129	Beier	Visualization of Dynamic Sub-microsecond Changes in Membrane Potential	4	4	3	3	7	7	1488	269	F	P	F		F	F
Biophysical J. 116(1)	2019-01-08	doi.org/10.1016/j.bpj.2018.11.020	Chen	Conformations of an RNA Helix-Junction-Helix Construct Revealed by SAXS Refinement of MD Simulations	7	1	9	0	16	1	3528	21	F	F	F		F	LSC, SAXS
Biophysical J. 116(1)	2019-01-08	doi.org/10.1016/j.bpj.2018.09.034	Felce	Constraints on GPCR Heterodimerization Revealed by the Type-4 Induced-Association BRET Assay	4	1	0	0	4	1	1101	52	F	F	P		F	LSC
Biophysical J. 116(1)	2019-01-08	doi.org/10.1016/j.bpj.2018.11.006	Khan	Architectural Dynamics of CaMKII-Actin Networks	8	7	4	2	12	9	2664	368	P	P	P	P	P	LSC, F, TIRF, TEM
Biophysical J. 116(1)	2019-01-08	doi.org/10.1016/j.bpj.2018.11.3127	Krishna	Interplay between Membrane Curvature and Cholesterol- Role of Palmitoylated Caveolin-1.pdf	5	0	12	0	17	0	1200	0
Biophysical J. 116(1)	2019-01-08	doi.org/10.1016/j.bpj.2018.11.3128	Lira	Highly Efficient Protein-free Membrane Fusion- A Giant Vesicle Study	6	4	14	12	20	16	4657	321	F	F	F		F	LSC, F, FLIM, P
Biophysical J. 116(1)	2019-01-08	doi.org/10.1016/j.bpj.2018.11.023	Markwick	Accurate Prediction of Amide Exchange in the Fast Limit Reveals Thrombin Allostery	5	0	0	0	5	0	1207	0
Biophysical J. 116(1)	2019-01-08	doi.org/10.1016/j.bpj.2018.11.011	Mathew	Mouse ICM Organoids Reveal Three-Dimensional Cell Fate Clustering	9	7	6	6	15	13	1633	101	P	F	F		F	LSC
Biophysical J. 116(1)	2019-01-08	doi.org/10.1016/j.bpj.2018.11.3124	Olson	Experimental and Theoretical Explorations of Traveling Waves and Tuning in the Bushcricket Ear	14	0	0	0	14	0	1031	0
Biophysical J. 116(1)	2019-01-08	doi.org/10.1016/j.bpj.2018.11.3122	Oshima	Population Shift Mechanism for Partial Agonism of AMPA Receptor	8	0	0	0	8	0	1386	0
Biophysical J. 116(1)	2019-01-08	doi.org/10.1016/j.bpj.2018.11.3131	Sugiura	Biophysical Parameters of the Sec14 Phospholipid Exchange Cycle	6	0	5	0	11	0	1169	0
Biophysical J. 116(1)	2019-01-08	doi.org/10.1016/j.bpj.2018.11.3130	Svetina	A Model of Piezo1-Based Regulation of Red Blood Cell Volume	7	0	0	0	7	0	110	0
Biophysical J. 116(1)	2019-01-08	doi.org/10.1016/j.bpj.2018.11.022	Yamashiro	Convection-Induced Biased Distribution of Actin Probes in Live Cells	6	3	4	2	10	5	1828	112	P	P	F		P	F, STORM?
									0	0
Biophysical J. 116(2)	2019-01-22	doi.org/10.1016/j.bpj.2018.11.3132	Cerofolini	Real-Time Insights into Biological Events- In-Cell Processes and Protein-Ligand Interactions	9	0	11	0	20	0	910	0
Biophysical J. 116(2)	2019-01-22	doi.org/10.1016/j.bpj.2018.12.008	Deng	Quantifying Shear-Induced Deformation and Detachment of Individual Adherent Sickle Red Blood Cells	7	2	3	1	10	3	2293	89	F	F	NA		F	T
Biophysical J. 116(2)	2019-01-22	doi.org/10.1016/j.bpj.2018.12.012	Feher	Mechanisms for Benzene Dissociation through the Excited State of T4 Lysozyme L99A Mutant	5	0	11	0	16	0	591	0
Biophysical J. 116(2)	2019-01-22	doi.org/10.1016/j.bpj.2018.12.002	Golla	Fosfomycin Permeation through the Outer Membrane Porin OmpF	5	0	6	0	11	0	2294	0
Biophysical J. 116(2)	2019-01-22	doi.org/10.1016/j.bpj.2018.11.3133	Guo	Fatty Acids Compete with Aβ in Binding to Serum Albumin by Quenching Its Conformational Flexibility	6	0	4	0	10	0	802	0
Biophysical J. 116(2)	2019-01-22	doi.org/10.1016/j.bpj.2018.12.007	Harrison	Molecular Mechanisms of Macular Degeneration Associated with the Complement Factor H Y402H Mutation	8	0	12	0	20	0	1879	0
Biophysical J. 116(2)	2019-01-22	doi.org/10.1016/j.bpj.2018.12.012	Horning	Three-Dimensional Cell Geometry Controls Excitable Membrane Signaling in Dictyostelium Cells	5	5	4	4	9	9	1671	137	P	P	P		P	SDC
Biophysical J. 116(2)	2019-01-22	doi.org/10.1016/j.bpj.2018.11.3138	Hubrich	SNARE-Mediated Fusion of Single Chromaffin Granules with Pore-Spanning Membranes	7	6	7	6	14	12	974	132	P	P	P		P	LSC
Biophysical J. 116(2)	2019-01-22	doi.org/10.1016/j.bpj.2018.12.003	Janes	Statistical Mechanics of an Elastically Pinned Membrane- Static Profile and Correlations	5	0	0	0	5	0	1418
Biophysical J. 116(2)	2019-01-22	doi.org/10.1016/j.bpj.2018.11.3134	Khetan	Quantitative Analysis of the Correlation between Cell Size and Cellular Uptake of Particles	9	1	0	0	9	1	574	23	F	F	F		F	SIM
Biophysical J. 116(2)	2019-01-22	doi.org/10.1016/j.bpj.2018.12.004	Mansson	Nonlinear Actomyosin Elasticity in Muscle?	9	0	2	0	11	0	2761	0
Biophysical J. 116(2)	2019-01-22	doi.org/10.1016/j.bpj.2018.11.3135	Nyholm	The Affinity of Sterols for Different Phospholipid Classes and Its Impact on Lateral Segregation	5	0	9	0	14	0	1770	0
Biophysical J. 116(2)	2019-01-22	doi.org/10.1016/j.bpj.2018.12.006	Sun	Predicting RNA-Metal Ion Binding with Ion Dehydration Effects	6	0	1	0	7	0	2329	0
Biophysical J. 116(2)	2019-01-22	doi.org/10.1016/j.bpj.2018.12.010	Wagele	How Fluorescent Tags Modify Oligomer Size Distributions of the Alzheimer Peptide	5	4	7	5	12	9	1619	178	P	P	F	P	P	FCS, TEM, AFM
Biophysical J. 116(2)	2019-01-22	doi.org/10.1016/j.bpj.2018.11.3136	Yoon	Revealing Nanoscale Morphology of the Primary Cilium Using Super-Resolution Fluorescence Microscopy	6	5	9	5	15	10	3109	1156	P	P	P		P	STED, STORM
Biophysical J. 116(2)	2019-01-22	doi.org/10.1016/j.bpj.2018.12.005	Zhang	The Mechanical Properties of RNA-DNA Hybrid Duplex Stretched by Magnetic Tweezers	6	0	4	0	10	0	850	1							7 LSC/SDC	4 F	1 T
					197	51	150	46	347	97	50445	3014
				Articles containing imaging (14):	82	51	73	38			28730	3014
				All articles (30):		IF/F=25.89%		SIF/SF=30.67%		TIF/TF=27.96		IT/T=5.84%
				Articles containing imaging (14):		IF/F=52/132=62.20%		IF/F=38/73=52.05%				IT/T=10.24%					P/F ratio: 50%
				Articles with no imaging (16)

## Sheet: JI
Journal volume (issue)	Pub Date	Digital Object Identifier (DOI)	Author	Title	Figures	Imaging figures	Supp Figs	Supp Imaging Figs	Total Figs	Total I Figs	Total text M&M, words	Text Imaging, words	Objective lens	Digitization	Spectral settings	EM Score	Global score	Imaging Modalities
J. of Immunology 201(7)	2018-08-22	doi: 10.4049/jimmunol.1800486	Ahmed	Activation of NF-κB in Synovium versus Cartilage from Patients with Advanced Knee Osteoarthritis = A Potential Contributor to Inflammatory Aspects of Disease Progression	5	0	1	0	6	0	1125	0
J. of Immunology 201(7)	2018-08-22	doi: 10.4049/jimmunol.1800570	Aue	Activation of Th1 Immunity within the Tumor Microenvironment Is Associated with Clinical Response to Lenalidomide in Chronic Lymphocytic Leukemia	4	1	2	0	6	1	946	15	F	F	NA		F	T
J. of Immunology 201(7)	2018-08-22	doi: 10.4049/jimmunol.1800554	Beckert	The Canonical but Not the Noncanonical Wnt Pathway Inhibits the Development of Allergic Airway Disease	7	2	4	0	11	2	1764	0	F	F	NA		F	T
J. of Immunology 201(7)	2018-08-22	doi: 10.4049/jimmunol.1701373	Bruni	IRAK1 Limits TLR3-4- and IFNAR-Driven IL-27 Production through a STAT1-Dependent Mechanism	9	0	1	0	10	0	685	0
J. of Immunology 201(7)	2018-08-22	doi: 10.4049/jimmunol.1800124	Chen	Epidermal Growth Factor (EGF) Autocrine Activation of Human Platelets Promotes EGF Receptor–Dependent Oral Squamous Cell Carcinoma Invasion, Migration, and Epithelial Mesenchymal Transition	7	3	0	0	7	3	979	21	F	F	F		F	F
J. of Immunology 201(7)	2018-08-22	doi: 10.4049/jimmunol.1800293	Fuseini	Testosterone Decreases House Dust Mite–Induced Type 2 and IL-17A–Mediated Airway Inflammation	8	0	4	1	12	1	1078	0	F	F	NA		F	T
J. of Immunology 201(7)	2018-08-22	doi: 10.4049/jimmunol.1800161	Kronstad	Differential Induction of IFN-α and Modulation of CD112 and CD54 Expression Govern the Magnitude of NK Cell IFN-γ Response to Influenza A Viruses	8	0	8	0	16	0	1727	0
J. of Immunology 201(7)	2018-08-22	doi: 10.4049/jimmunol.1800498	Li	Characterization of an NLRP1 Inflammasome from Zebrafish Reveals a Unique Sequential Activation Mechanism Underlying Inflammatory Caspases in Ancient Vertebrates	15	5	3	1	18	6	2267	38	F	F	F		F	LSC, T
J. of Immunology 201(7)	2018-08-22	doi: 10.4049/jimmunol.1800726	Lubkowski	Crystal Structure of the Labile Complex of IL-24 with the Extracellular Domains of IL-22R1 and IL-20R2	5	0	0	0	5	0	3341	0
J. of Immunology 201(7)	2018-08-22	doi: 10.4049/jimmunol.1800716	Miron	Human Lymph Nodes Maintain TCF-1hi Memory T Cells with High Functional Potential and Clonal Diversity throughout Life	7	0	2	0	9	0	917	0
J. of Immunology 201(7)	2018-08-22	doi: 10.4049/jimmunol.1701738	Murphy	Cutting Edge: Elevated Leptin during Diet-Induced Obesity Reduces the Efficacy of Tumor Immunotherapy	4	0	2	0	6	0	498	0
J. of Immunology 201(7)	2018-08-22	doi: 10.4049/jimmunol.1700507	Napier	Nod2 Deficiency Augments Th17 Responses and Exacerbates Autoimmune Arthritis	6	4	0	0	6	4	1299	109	F	F	F		F	T, FL
J. of Immunology 201(7)	2018-08-22	doi: 10.4049/jimmunol.1800767	Nechvatalova	Absence of Surface IgD Does Not Impair Naive B Cell Homeostasis or Memory B Cell Formation in IGHD Haploinsufficient Humans	4	0	1	0	5	0	1037	0	F	F	F		F
J. of Immunology 201(7)	2018-08-22	doi: 10.4049/jimmunol.1800429	Ngai	IL-21 Selectively Protects CD62L+ NKT Cells and Enhances Their Effector Functions for Adoptive Immunotherapy	6	1	4	1	10	2	1129	17	NA	F	NA		F	BLI
J. of Immunology 201(7)	2018-08-22	doi: 10.4049/jimmunol.1800740	Olsen	Prime-and-Trap Malaria Vaccination To Generate Protective CD8+ Liver-Resident Memory T Cells	5	1	3	1	8	2	1359	28	NA	P	NA		P	BLI
J. of Immunology 201(7)	2018-08-22	doi: 10.4049/jimmunol.1800296	Ozogor	Sialic Acid Ligand Binding of CD22 and Siglec-G Determines Distinct B Cell Functions but Is Dispensable for B Cell Tolerance Induction	7	1	3	0	10	1	1573	17	F	F	F		F	F
J. of Immunology 201(7)	2018-08-22	doi: 10.4049/jimmunol.1800465	Presa	A Hypermorphic Nfkbid Allele Contributes to Impaired Thymic Deletion of Autoreactive Diabetogenic CD8+ T Cells in NOD Mice	6	0	2	0	8	0	1830	0
J. of Immunology 201(7)	2018-08-22	doi: 10.4049/jimmunol.1800339	Ri Jung	Collateral Damage: What Effect Does Anti-CD4 and Anti-CD8α Antibody–Mediated Depletion Have on Leukocyte Populations	6	0	0	0	6	0	722	0
J. of Immunology 201(7)	2018-08-22	doi: 10.4049/jimmunol.1800076	Robledo-Avila	Dysregulated Calcium Homeostasis in Cystic Fibrosis Neutrophils Leads to Deficient Antimicrobial Responses	7	3	4	3	11	6	1631	81	F	F	F	P	F	SIM, F, T, TEM
J. of Immunology 201(7)	2018-08-22	doi: 10.4049/jimmunol.1800665	Saleh	CSF-1 in Inflammatory and Arthritic Pain Development	7	6	4	4	11	10	1035	0	F	F	NA		F	T
J. of Immunology 201(7)	2018-08-22	doi: 10.4049/jimmunol.1800578	Spangler	Engineering a Single-Agent Cytokine-Antibody Fusion That Selectively Expands Regulatory T Cells for Autoimmune Disease Therapy	6	0	4	0	10	0	2722	0
J. of Immunology 201(7)	2018-08-22	doi: 10.4049/jimmunol.1800206	Taitano	Differential Influence on Regulatory B Cells by TH2 Cytokines Affects Protection in Allergic Airway Disease	6	0	3	0	9	0	1094	0
J. of Immunology 201(7)	2018-08-22	doi: 10.4049/jimmunol.1800070	Teitz-Tennenbaum	Autocrine IL-10 Signaling Promotes Dendritic Cell Type-2 Activation and Persistence of Murine Cryptococcal Lung Infection	7	1	4	0	11	1	1279	26	F	F	NA		F	T
J. of Immunology 201(7)	2018-08-22	doi: 10.4049/jimmunol.1701479	Vigneron	Cytosolic Processing Governs TAP-Independent Presentation of a Critical Melanoma Antigen	6	0	4	1	10	1	912	0	F	F	F		F	F
J. of Immunology 201(7)	2018-08-22	doi: 10.4049/jimmunol.1800475	Walwyn-Brown	Human NK Cells Lyse Th2-Polarizing Dendritic Cells via NKp30 and DNAM-1	6	3	1	0	7	3	2285	92	P	F	F		F	LSC, F, STED, IR
J. of Immunology 201(7)	2018-08-22	doi: 10.4049/jimmunol.1800224	Weber	PPARγ Deficiency Suppresses the Release of IL-1β and IL-1α in Macrophages via a Type 1 IFN–Dependent Mechanism	11	0	3	0	14	0	1943	0
J. of Immunology 201(7)	2018-08-22	doi: 10.4049/jimmunol.1800235	Xu	Impaired Development and Expansion of Germinal Center Follicular Th Cells in Simian Immunodeficiency Virus–Infected Neonatal Macaques	5	3	0	0	5	3	1175	58	F	F	F		F	LSC, T
J. of Immunology 201(7)	2018-08-22	doi: 10.4049/jimmunol.1701502	Yokoyama	IL-2–Anti–IL-2 Monoclonal Antibody Immune Complexes Inhibit Collagen-Induced Arthritis by Augmenting Regulatory T Cell Functions	6	2	0	0	6	2	941	0	F	F	NA		F	T
J. of Immunology 201(7)	2018-08-22	doi: 10.4049/jimmunol.1800230	Zhang	miR-143 Regulates Memory T Cell Differentiation by Reprogramming T Cell Metabolism	7	0	4	0	11	0	1344	0
J. of Immunology 201(7)	2018-08-22	doi: 10.4049/jimmunol.1701727	Zhang	Three-Dimensional Ameliorated Biologics Elicit Thymic Renewal in Tumor-Bearing Hosts	6	6	4	4	10	10	1097	23	F	F	F		F	LSC, R, MRI
J. of Immunology 201(7)	2018-08-22	doi: 10.4049/jimmunol.1700605	Zhou	The PGI2 Analog Cicaprost Inhibits IL-33–Induced Th2 Responses, IL-2 Production, and CD25 Expression in Mouse CD4+ T Cells	8	0	2	0	10	0	929	0
					207	42	77	16	284	58	42663	525							4 LSC/SDC	5 F	10T
				Articles containing imaging (17):	115	42	44	16	162	60	22749	525
				All articles (31):		IF/I=28.89%		SIF/IF=22.08%		TIF/TF=21.13%		MI/M=1.23%
				Articles containing imaging (17):		IF/I=36.1%		SIF/IF=37.78%		TIF/TF=37.04%		MI/M=2.31%					P/F ratio: 5.9%
				Articles with no imaging (14)

## Sheet: Summary
Journal	Papers	Figures	Imaging Figures	% Imaging Figures	Supplemental Figures	Imaging Supplemental	% Supplemental Imaging	Total Figures	Total Imaging	% Total Imaging	Words M&M	Words Imaging M&M	% Imaging M&M	Eligible articles	Pass Objective	Pass digitization	Pass spectral	Pass EM	Pass global	Pass Global Percentage
Developmental Biology	30	225	179	79.5556	124	96	77.4194	347	273	78.6744	39749	1687	4.24413	29	4	2	2	0	1	3.44828
Development	28	196	158	80.6122	211	147	69.6682	407	305	74.9386	36063	2514	6.97113	28	9	6	1	0	4	14.2857
Developmental Cell	32	211	151	71.564	181	118	65.1934	392	269	68.6224	79932	3844	4.80909	32	5	3	2	0	3	9.375
Total Dev Bio	90	632	488	77.2152	516	361	69.9612	1146	847	73.9092	155744	8045	5.16553	89	18	11	5	0	8	8.98876
Journal of Cell Biology	30	238	182	76.4706	125	80	64	363	262	72.1763	74939	7585	10.1216	29	19	8	4	6	11	37.931
Journal of Neuroscience	30	227	84	37.0044				227	84	37.0044	73250	3525	4.81229
J. Neuroscience Image Containing	18	123	68	55.2846				123	68	55.2846	44972	3525	7.83821	14	4	2	2	2	1	7.14286
Nature Immunology	29	206	52	25.2427	207	38	18.3575	413	90	21.7918	78872	2924	3.70727
Nat Immunol Image Containing	18	132	52	39.3939	132	38	28.7879	264	90	34.0909	52891	2924	5.52835	17	1	4	1	1	2	11.7647
Biophysical J.	30	197	51	25.8883	150	46	30.6667	347	97	27.9539	50445	3014	5.97482
Biophysical J. Image Containing	14	82	51	62.1951	73	46	63.0137	155	97	62.5806	28730	2943	10.2436	14	7	7	6	2	7	50
Journal of Immunology	31	207	42	20.2899	77	17	22.0779	284	59	20.7746	42663	525	1.23057
J. Immunol. Image Containing	18	119	42	35.2941	45	17	37.7778	164	59	35.9756	22749	525	2.30779	17	1	1	0	1	1	5.88235
	398	2795	1600		1841	1004		4632	2600		780999	43580		269	50	33	18	12	30	11.1524
Total	240	1707	899	52.6655	1075	542	50.4186	2780	1439	51.7626	380025	25547	6.72245	180	50	33	18	12	30	16.6667
Total Immunology	60	413	94	22.7603	284	55	19.3662	697	149	21.3773	75640	3449	4.55976	34	2	5	1	2	3	8.82353		Confocal 114	Fluorescence 75	Transmitted 57

## Sheet: Abbreviations
Imaging modalities abbreviature	Imaging modality			Qualitiy Evaluation Code
LSC	fluorescence laser scanning confocal			P	Pass
SDC	spinning disk confocal			F	Fail
SIM	apotome
F	wide field fluorescence
T	bright field transmitted light
P	phase contrast
D	differential interference contrast
BLI	whole animal imaging bioluminescence
FL	whole animal imaging fluorescence
R	reflected light
OPT	optical projection tomography
XRY	X-ray
MCT	micro computerized tomography
TEM	transmitted electron microscopy
SEM	scanning electron microscopy
CryoEM	electron tomography
LS	light sheet
FCS	fluorescence correlation spectroscopy											: ; .
RLSC	reflectance laser scanning confocal
SBF	serial block face SEM
MPE	multi photon excitation fluorescence microsocopy
TIRF	total internal eflection fluorescence microscopy
SIM-SR	structured illumination super resolution
FLIM	fluorescence lifetime imaging
SAXS	Small angle X-Ray scattering
IR	interference reflectance
