# Supplementary material for: Imaging methods are vastly underreported in biomedical research
Source: eLife. 2020 Aug 11;9:e55133. doi: 10.7554/eLife.55133 (PMC7434332; doi:10.7554/eLife.55133)
Supplement: Supplementary file 3. [file elife-55133-supp3.xlsx]

## Sheet: September 10 2019
Filename	BLURB	UNKNOWNs	Word count	% known
Captured DUV-b SpectralMAS cotrol.nd2	The data was acquired on a Nikon Ni-E UNKNOWN microscope, using a Plan Fluor 4x PhL DL 0.13 NA objective. The pixel size was 6.21 microns. The excitation and emission wavelengths for channel 1 were UNKNOWN and 499 nm and the exposure time was 393.73 ms. The excitation and emission wavelengths for channel 2 were UNKNOWN and 509 nm and the exposure time was 393.73 ms. The excitation and emission wa…	18	366	0.95082
CareyLyons4_29_19 - Deconvolved, TypeAutomatic-int - Intensity Equalized.nd2	The data was acquired on a Nikon Ti UNKNOWN microscope, using a Plan Apo 10x 0.45 NA objective. The pixel size was 0.84 microns. A series of slices was collected with a step size of 3.73 microns. The excitation and emission wavelengths for channel 1 were UNKNOWN and 595 nm and the exposure time was 4.18489898449 s. The excitation and emission wavelengths for channel 2 were UNKNOWN and 700 nm and …	5	96	0.947917
fluorescentreference.tif		0	1	1
mcf7 cc8 cd45 1.nd2	The data was acquired on a Nikon Ni-E UNKNOWN microscope, using a Plan Apo 20x DIC M 0.75 NA objective. The pixel size was 0.39 microns. The excitation and emission wavelengths for channel 1 were UNKNOWN and 447 nm and the exposure time was UNKNOWN. The excitation and emission wavelengths for channel 2 were UNKNOWN and 525 nm and the exposure time was UNKNOWN.	5	64	0.921875
MDA231 MC 6 7 4 Lum.bip	The data was acquired on a UNKNOWN microscope, using a UNKNOWN UNKNOWN NA objective. The pixel size was UNKNOWN microns. The excitation and emission wavelengths for channel 1 were UNKNOWN and UNKNOWN and the exposure time was 5.0 s.	6	39	0.846154
Muscle lam eMHC x9.oib	The data was acquired on a Olympus UNKNOWN microscope, using a 20x 0.85 NA objective. The pixel size was 0.14 microns. The excitation and emission wavelengths for channel 1 were 488 nm and 520 nm and the exposure time was UNKNOWN. The excitation and emission wavelengths for channel 2 were 543 nm and 603 nm and the exposure time was UNKNOWN.	3	61	0.95082
Plate000_WellG10_ChannelDAPI 405,substrate,hydrolyzed_Seq0081.nd2	The data was acquired on a Nikon Ti UNKNOWN microscope, using a Plan Apo 4x 0.2 NA objective. The pixel size was 3.11 microns. The excitation and emission wavelengths for channel 1 were UNKNOWN and 450 nm and the exposure time was 11.7453794291 s. The excitation and emission wavelengths for channel 2 were UNKNOWN and 595 nm and the exposure time was 11.7453794291 s. The excitation and emission wa…	4	84	0.952381
Positive_001.nd2	The data was acquired on a Nikon AZ100 UNKNOWN microscope, using a AZ Plan Apo 1x 0.1 NA objective. The pixel size was 11.11 microns. The excitation and emission wavelengths for channel 1 were UNKNOWN and 535 nm and the exposure time was 5.0 s.	2	45	0.955556
prettymouse head002.nd2	The data was acquired on a Nikon Ti UNKNOWN microscope, using a Plan Apo 20x 0.75 NA objective. The pixel size was 0.42 microns. A series of slices was collected with a step size of 2.00 microns. The excitation and emission wavelengths for channel 1 were UNKNOWN and 450 nm and the exposure time was 8.0 s. The excitation and emission wavelengths for channel 2 were UNKNOWN and 525 nm and the exposu…	7	115	0.93913
PSFgalore.czi	The data was acquired on a Zeiss TIRF microscope, using a 100x 1.46 NA objective. The pixel size was 0.16 microns. The excitation and emission wavelengths for channel 1 were 587 nm and 610 nm and the exposure time was 30.00 ms.	0	42	1
ptrettytonsil40x_005.nd2	The data was acquired on a Nikon Ti UNKNOWN microscope, using a Plan Fluor 40x Oil DIC H N2 1.3 NA objective. The pixel size was 0.10 microns. A series of slices was collected with a step size of 0.10 microns. The excitation and emission wavelengths for channel 1 were UNKNOWN and 525 nm and the exposure time was 1.06666666667 s. The excitation and emission wavelengths for channel 2 were UNKNOWN a…	3	81	0.962963
SPectral_5nm.oib	The data was acquired on a Olympus UNKNOWN microscope, using a 40x 1.3 NA objective. The pixel size was 0.25 microns. The excitation and emission wavelengths for channel 1 were 488 nm and 520 nm and the exposure time was UNKNOWN. The excitation and emission wavelengths for channel 2 were UNKNOWN and UNKNOWN and the exposure time was UNKNOWN. The excitation and emission wavelengths for channel 3 w…	59	383	0.845953
tau_missort_8-30-19_P301L-0007.nd2	The data was acquired on a Nikon Ti UNKNOWN microscope, using a Plan Apo 40x DIC M N2 0.95 NA objective. The pixel size was 0.22 microns. A series of slices was collected with a step size of 0.30 microns. The excitation and emission wavelengths for channel 1 were UNKNOWN and 605 nm and the exposure time was 100.00 ms. The excitation and emission wavelengths for channel 2 were UNKNOWN and 520 nm a…	3	80	0.9625
tile_x003_y004_z033.tif		0	1	1
Torsin_EGFP-08.czi	The data was acquired on a Zeiss spinning disk confocal microscope, using a 100x 1.4 NA objective. The pixel size was 0.13 microns. A series of slices was collected with a step size of 0.32 microns. The excitation and emission wavelengths for channel 1 were 587 nm and 610 nm and the exposure time was 30.00 ms. The excitation and emission wavelengths for channel 2 were 493 nm and 517 nm and the ex…	0	99	1
UBrand_10x_confocal.nd2	The data was acquired on a Nikon Ni-E UNKNOWN microscope, using a Plan Apo 10x 0.45 NA objective. The pixel size was 1.23 microns. A series of slices was collected with a step size of 2.90 microns. The excitation and emission wavelengths for channel 1 were UNKNOWN and 447 nm and the exposure time was 2.00251770027 s. The excitation and emission wavelengths for channel 2 were UNKNOWN and 525 nm an…	4	97	0.958763
z serries.oib	The data was acquired on a Olympus UNKNOWN microscope, using a 60x 1.42 NA objective. The pixel size was 0.23 microns. A series of slices was collected with a step size of 0.80 microns. The excitation and emission wavelengths for channel 1 were 405 nm and 422 nm and the exposure time was UNKNOWN. The excitation and emission wavelengths for channel 2 were 488 nm and 520 nm and the exposure time wa…	4	94	0.957447

## Sheet: May 22 2020
Filename	BLURB
AshimRai_dab2 gfp 1.czi	The data was acquired on a Zeiss TIRF microscope, using a 100x 1.46 NA objective. The pixel size was 0.16 microns. The excitation and emission wavelengths for channel 1 were 488 nm and 509 nm and the exposure time was 200.00 ms.
Captured DUV-b SpectralMAS cotrol.nd2	The data was acquired on a Nikon Ni-E UNKNOWN microscope, using a Plan Fluor 4x PhL DL 0.13 NA objective. The pixel size was 6.21 microns. The excitation and emission wavelengths for channel 1 were UNKNOWN and 499 nm and the exposure time was 393.73 ms. The excitation and emission wavelengths for channel 2 were UNKNOWN and 509 nm and the exposure time was 393.73 ms. The excitation and emission wa…
CareyLyons4_29_19 - Deconvolved, TypeAutomatic-int - Intensity Equalized.nd2	The data was acquired on a Nikon Ti UNKNOWN microscope, using a Plan Apo 10x 0.45 NA objective. The pixel size was 0.84 microns. A series of slices was collected with a step size of 3.73 microns. The excitation and emission wavelengths for channel 1 were UNKNOWN and 595 nm and the exposure time was 4.18489898449 s. The excitation and emission wavelengths for channel 2 were UNKNOWN and 700 nm and …
LisaChou_4_4_19_002.nd2	The data was acquired on a Nikon Ni-E UNKNOWN microscope, using a Plan Apo 20x 0.75 NA objective. The pixel size was 0.52 microns. The excitation and emission wavelengths for channel 1 were UNKNOWN and 525 nm and the exposure time was 16.0 s. The excitation and emission wavelengths for channel 2 were UNKNOWN and 593 nm and the exposure time was 16.0 s. The excitation and emission wavelengths for …
Plate000_WellG10_ChannelDAPI 405,substrate,hydrolyzed_Seq0081.nd2	The data was acquired on a Nikon Ti UNKNOWN microscope, using a Plan Apo 4x 0.2 NA objective. The pixel size was 3.11 microns. The excitation and emission wavelengths for channel 1 were UNKNOWN and 450 nm and the exposure time was 11.7453794291 s. The excitation and emission wavelengths for channel 2 were UNKNOWN and 595 nm and the exposure time was 11.7453794291 s. The excitation and emission wa…
prettymouse head002.nd2	The data was acquired on a Nikon Ti UNKNOWN microscope, using a Plan Apo 20x 0.75 NA objective. The pixel size was 0.42 microns. A series of slices was collected with a step size of 2.00 microns. The excitation and emission wavelengths for channel 1 were UNKNOWN and 450 nm and the exposure time was 8.0 s. The excitation and emission wavelengths for channel 2 were UNKNOWN and 525 nm and the exposu…
PSFgalore.czi	The data was acquired on a Zeiss TIRF microscope, using a 100x 1.46 NA objective. The pixel size was 0.16 microns. The excitation and emission wavelengths for channel 1 were 587 nm and 610 nm and the exposure time was 30.00 ms.
ptrettytonsil40x_005.nd2	The data was acquired on a Nikon Ti UNKNOWN microscope, using a Plan Fluor 40x Oil DIC H N2 1.3 NA objective. The pixel size was 0.10 microns. A series of slices was collected with a step size of 0.10 microns. The excitation and emission wavelengths for channel 1 were UNKNOWN and 525 nm and the exposure time was 1.06666666667 s. The excitation and emission wavelengths for channel 2 were UNKNOWN a…
tile_x003_y004_z033.tif
Torsin_EGFP-08.czi	The data was acquired on a Zeiss spinning disk confocal microscope, using a 100x 1.4 NA objective. The pixel size was 0.13 microns. A series of slices was collected with a step size of 0.32 microns. The excitation and emission wavelengths for channel 1 were 587 nm and 610 nm and the exposure time was 30.00 ms. The excitation and emission wavelengths for channel 2 were 493 nm and 517 nm and the ex…
UBrand_10x_confocal.nd2	The data was acquired on a Nikon Ni-E UNKNOWN microscope, using a Plan Apo 10x 0.45 NA objective. The pixel size was 1.23 microns. A series of slices was collected with a step size of 2.90 microns. The excitation and emission wavelengths for channel 1 were UNKNOWN and 447 nm and the exposure time was 2.00251770027 s. The excitation and emission wavelengths for channel 2 were UNKNOWN and 525 nm an…
z serries.oib	The data was acquired on a Olympus UNKNOWN microscope, using a 60x 1.42 NA objective. The pixel size was 0.23 microns. A series of slices was collected with a step size of 0.80 microns. The excitation and emission wavelengths for channel 1 were 405 nm and 422 nm and the exposure time was UNKNOWN. The excitation and emission wavelengths for channel 2 were 488 nm and 520 nm and the exposure time wa…
